# Supplementary material for: Towards room-temperature ionic liquid crystals
Source: Royal Society of Chemistry journal article supplement (doi:10.1039/c2ta00133k), 2012-10-05
Supplement: c2ta00133k.pdf [file c2ta00133k.pdf]

# Towards Room-Temperature Ionic Liquid Crystals

*Alexandra Alvarez-Fernandez,<sup>a</sup> Laurens T. de Haan<sup>a</sup> and Paul H.J. Kouwer\**

Radboud University Nijmegen, Institute for Molecules and Materials  
Nijmegen, the Netherlands  
Email: p.kouwer@science.u.nl

## *Supporting Information*

### *Table of contents*

|                                                    |     |
|----------------------------------------------------|-----|
| Synthetic procedures .....                         | S2  |
| Instrumental                                       |     |
| Synthesis of ILC precursors.....                   | S2  |
| ILC precursors 5a-5c                               |     |
| ILC precursors 5d-5e                               |     |
| Synthesis of starting materials .....              | S4  |
| Oleyl esterification                               |     |
| Finkelstein reaction                               |     |
| Octadecyl esterification                           |     |
| Finkelstein reaction                               |     |
| Synthesis of [Ag][NTf <sub>2</sub> ]               |     |
| Synthesis of ILC .....                             | S6  |
| Serie 1 ( oleyl and octadecyl alkylation)          |     |
| Serie 2 (BF <sub>4</sub> <sup>-</sup> metathesis)  |     |
| Serie 3 (NTf <sub>2</sub> <sup>-</sup> metathesis) |     |
| Mesomorphic properties of ILC .....                | S12 |
| Molecular modeling .....                           | S13 |
| References.....                                    | S14 |

## Synthetic procedures

### Instrumental

$^1\text{H}$  and  $^{13}\text{C}$  NMR spectra were recorded on a Varian VXR-400 (400 MHz) and a Bruker AC-300 (300 MHz) spectrometer. Spectra were recorded in  $\text{CDCl}_3$ . Chemical shifts are reported in ppm referenced against TMS, which was added as an internal reference. Optical microscopy was carried out on an Olympus BX60 microscope equipped with a Mettler FP82HT hot stage and digital camera using standard glass microscope slides. DSC experiments were performed on a TA Instruments DSC Q100.

HRMS (EI) measurements of ILC belonging to serie 1, were performed on a JEOL Accu TOF-CS instrument using acetonitrile as solvent.

### Scheme S1: Synthesis of starting materials and ILC precursors

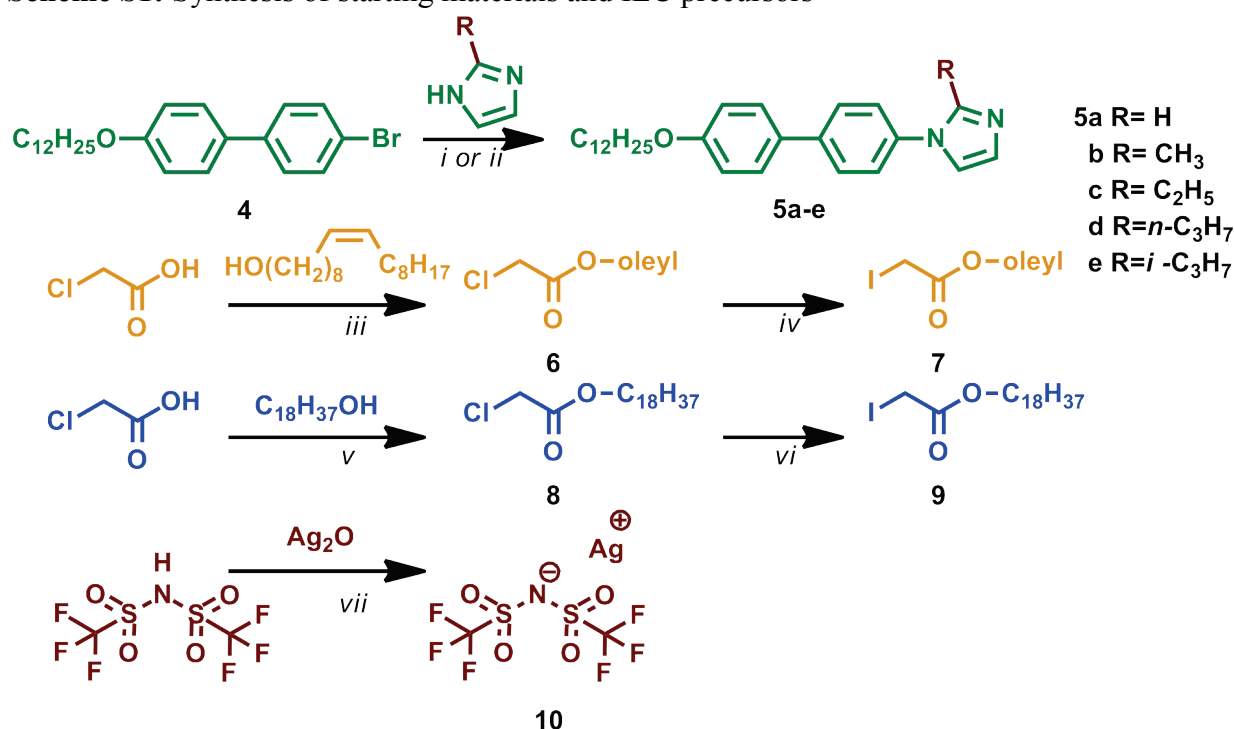

Key: (i)  $\text{K}_2\text{CO}_3$ , CuI, *N,N*-dimethylglycine, DMSO, 48-72 hrs at  $110^\circ\text{C}$ ; (ii)  $\text{Cs}_2\text{CO}_3$ ,  $\text{Cu}_2\text{O}$ , 4,7-dimethoxy-1,10-phenanthroline, NMP,  $110^\circ\text{C}$ , 5 days reflux; (iii, v) PTSA, Toluene, 24 hrs, reflux; (iv, vi) NaI, acetone, rt, 8hrs; (vii)  $\text{Ag}_2\text{O}$ , toluene, reflux over night

### Synthesis of ILC precursors general procedure (scheme S1, step i, ii)

#### ILC precursors 5a-5c

**General procedure:** 4-Bromo-4'-(dodecyloxy)-1,1'-biphenyl<sup>1</sup> (**4**) (1.82 mmol), imidazole, 2-methyl imidazole or 2-ethyl imidazole (3.38 mmol), CuI (0.19 mmol), dimethyl glycine (0.38 mmol), and  $\text{K}_2\text{CO}_3$  (7.09 mmol), were stirred in 6 ml DMSO for 4 days at  $110^\circ\text{C}$ . The crude product was precipitated in 500 ml of 1M  $\text{NH}_3$  solution, extracted with  $\text{CH}_2\text{Cl}_2$  and purified via column chromatography ( $\text{SiO}_2$ ) using  $\text{CH}_2\text{Cl}_2$ /heptane 1:1 as the eluent to remove the starting material. To afford the final product, the polarity of the  $\text{CH}_2\text{Cl}_2$  was increased from 0  $\rightarrow$  10% MeOH. Yield (**5a**): 62%, (**5b**): 64%, (**5c**): 60% yellow solid.

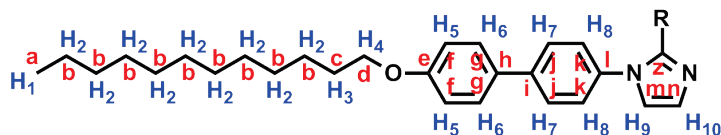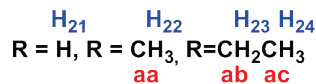

### 5a

$^1\text{H-NMR}$ , 400 MHz,  $\text{CDCl}_3$ ,  $\delta$  ppm: 7.89 (s, 1H,  $H_{21}$ ), 7.64 (m, 2H,  $H_8$ ), 7.52 (m, 2H,  $H_6$ ), 7.43 (m, 2H,  $H_7$ ), 7.31 (s, 1H,  $H_9$  or  $H_{10}$ ), 7.23 (s, 1H,  $H_9$  or  $H_{10}$ ), 6.99 (m, 2H,  $H_5$ ), 4.01 (t, 2H,  $J=6.6\text{Hz}$ ,  $H_4$ ), 1.77 (m, 2H,  $H_3$ ), 1.40 (m, 18H,  $H_2$ ), 0.90 (m, 3H,  $H_1$ ).  $^{13}\text{C-NMR}$ , 300 MHz,  $\text{CDCl}_3$ ,  $\delta$  ppm: 159.19 (e), 142.93 (l), 136.04 (z), 132.05 (i), 130.34 (h), 127.82 (g or j), 127.79 (g or j), 126.04 (k), 123.11 (m or n), 121.55 (m or n), 114.65 (f), 67.72 (d), 31.44 - 24.52 (b), 13.65 (a).

### 5b

$^1\text{H-NMR}$ , 400 MHz,  $\text{CDCl}_3$ ,  $\delta$  ppm: 7.64 (m, 2H,  $H_8$ ), 7.54 (m, 2H,  $H_6$ ), 7.33 (m, 2H,  $H_7$ ), 7.05 (d, 1H,  $J=1.4\text{Hz}$ ,  $H_9$  or  $H_{10}$ ), 7.04 (d, 1H,  $J=1.4\text{Hz}$ ,  $H_9$  or  $H_{10}$ ), 7.00 (m, 2H,  $H_5$ ), 4.02 (t, 2H,  $J=6.6\text{Hz}$ ,  $H_4$ ), 2.40 (s, 3H,  $H_{22}$ ), 1.82 (m, 2H,  $H_3$ ), 1.36 (m, 18H,  $H_2$ ), 0.92 (m, 3H,  $H_1$ ).  $^{13}\text{C-NMR}$ , 300 MHz,  $\text{CDCl}_3$ ,  $\delta$  ppm: 159.22 (e), 146.06 (z), 143.48 (l), 132.13 (i), 130.53 (h), 127.82 (g or j), 127.79 (g or j), 126.04 (k), 123.11 (m or n), 121.55 (m or n), 114.65 (f), 67.72 (d), 31.43-24.52 (b), 13.65 (a), 12.45 (aa).

### 5c

7.75 (m, 3H,  $H_8 + H_9$  or  $H_{10}$ ), 7.69 (m, 2H,  $H_7$ ), 7.54 (m, 2H,  $H_6$ ), 7.30 (t, 1H,  $J=2.1\text{Hz}$ ,  $H_9$  or  $H_{10}$ ), 7.01 (m, 2H,  $H_5$ ), 4.01 (t, 2H,  $J_3=6.6\text{Hz}$ ,  $H_4$ ), 3.15 (q, 2H,  $J=7.7\text{Hz}$ ,  $H_{23}$ ), 1.71 (q, 2H,  $J=6.8\text{Hz}$ ,  $H_3$ ), 1.39 (m, 18H,  $H_2$ ), 1.13 (t, 3H,  $J=7.7\text{Hz}$ ,  $H_{24}$ ), 0.89 (t, 3H,  $J=6.9\text{Hz}$ ,  $H_1$ ).  $^{13}\text{C-NMR}$ , 300 MHz,  $\text{CDCl}_3$ ,  $\delta$  ppm: 159.27 (e), 149.78 (z), 143.64 (l), 132.13 (i), 130.44 (h), 127.82 (g + j), 126.07 (k), 123.15 (m or n), 121.97 (m or n), 114.67 (f), 67.74 (d), 31.44 - 24.51 (b), 19.14 (ab), 13.65 (a), 11.01 (ac).

### ILC precursors 5d-5e:

**General procedure:** 4-bromo-4'-(dodecyloxy)-1,1'-biphenyl<sup>1</sup> (**4**) ( 8.61 mmol), propyl imidazole or 2-isopropyl imidazole (16.8 mmol),  $\text{Cu}_2\text{O}$  (0.57 mmol), 4,7-dimethoxy-1,10-phenanthroline<sup>2</sup> (0.9 mmol), and  $\text{Cs}_2\text{CO}_3$  (12.5 mmol), stirred in 10 ml of *N*-methylpyrrolidone (NMP), 110°C, for 5 days. The crude product was precipitated in 500 ml of 1M  $\text{NH}_3$  solution, extracted with  $\text{CH}_2\text{Cl}_2$  and purified via column chromatography ( $\text{SiO}_2$ ) by following the same procedure for precursors **5a-5c**. Yield (**5d**) 68% (**5e**) (37%) of a tan solid.

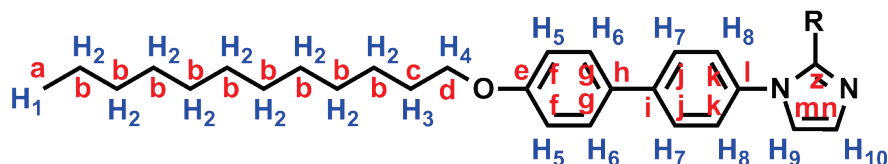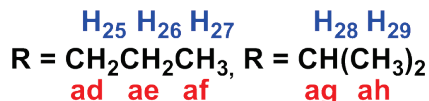

### 5d

$^1\text{H-NMR}$ , 400 MHz,  $\text{CDCl}_3$ ,  $\delta$  ppm: 7.64 (m, 2H,  $H_8$ ), 7.55 (m, 2H,  $H_6$ ), 7.32 (m, 2H,  $H_7$ ), 7.08 (d, 1H,  $J=1.2\text{Hz}$ ,  $H_9$  or  $H_{10}$ ), 7.00 (m, 3H,  $H_5 + H_9$  or  $H_{10}$ ), 4.01 (t, 2H,  $J=6.6\text{Hz}$ ,  $H_4$ ), 2.65 (m, 2H,  $H_{25}$ ), 1.77 (m, 4H,  $H_3 + H_{26}$ ), 1.40 (m, 18H,  $H_2$ ), 0.90 (m, 6H,  $H_1 + H_{27}$ ).  $^{13}\text{C-NMR}$ , 300 MHz,  $\text{CDCl}_3$ ,  $\delta$  ppm: 159.27 (e), 148.81 (z), 143.59 (l), 132.22 (i), 130.42 (h), 127.82 (g or j), 127.78 (g or j), 126.16 (k), 123.15 (m or n), 122.01 (m or n), 114.67 (f), 67.74 (d), 31.44-24.51 (b + ae), 20.28 (ad), 13.64 (a), 13.36 (af)

### 5e

$^1\text{H-NMR}$ , 400 MHz,  $\text{CDCl}_3$ ,  $\delta$  ppm: 7.63 (m, 2H,  $H_8$ ), 7.53 (m, 2H,  $H_6$ ), 7.30 (m, 2H,  $H_7$ ), 7.07 (d, 1H,  $J=1.2\text{Hz}$ ,  $H_9$  or  $H_{10}$ ), 6.99 (m, 2H,  $H_5$ ), 6.94 (d, 1H,  $J=1.3\text{Hz}$ ,  $H_9$  or  $H_{10}$ ), 4.00 (t, 2H,  $J=6.7\text{Hz}$ ,  $H_4$ ), 3.02 (m, 1H,  $H_{28}$ ), 1.80 (m, 2H,  $H_3$ ), 1.37 (m, 24H,  $H_2 + H_{29}$ ), 0.88 (t, 3H,  $J=6.9\text{Hz}$ ,  $H_1$ ).  $^{13}\text{C-NMR}$ , 300 MHz,  $\text{CDCl}_3$ ,  $\delta$  ppm: 159.35 (e), 150.82 (z), 143.95 (l), 132.37 (i), 130.29 (h), 127.83 (g or j), 127.55 (g or j), 126.86 (k), 124.03 (m or n), 122.79 (m or n), 114.70 (f), 67.75 (d), 31.43-24.51 (b), 19.81 (ag), 13.64 (ah+a).

## Synthesis of starting materials

### Oleyl chloroacetic acid (6) - (scheme S1, step iii)

Oleyl alcohol (technical grade: approx. 85% cis and 15% trans) (32 mmol) and 2-chloroacetic acid (40 mmol) were dissolved in 100 ml toluene. A catalytic amount of *para*-toluene sulfonic acid was added, the mixture was refluxed overnight while water was removed using a Dean-Stark trap. The solvent was removed via rotary evaporation and 100 ml hexane was added to the resulting mixture. The solution was washed (x3) with a saturated  $\text{NaHCO}_3$  solution, dried over magnesium sulfate and the solvent was removed via rotary evaporation. Yield: 90%.  $^1\text{H-NMR}$ , 400 MHz,  $\text{CDCl}_3$ ,  $\delta$  ppm: 5.34 (m, 2H,  $H_6 + H_7$ ), 4.35 (s, 2H,  $H_1$ ), 4.13 (t, 2H,  $J=6.7\text{Hz}$ ,  $H_2$ ), 1.99 (m, 4H,  $H_5 + H_8$ ), 1.65 (m, 2H,  $H_3$ ), 1.32 (m, 22H,  $H_4 + H_9$ ), 0.88 (t, 3H,  $J=6.3\text{Hz}$ ,  $H_{10}$ ).  $^{13}\text{C-NMR}$ , 300 MHz,  $\text{CDCl}_3$ ,  $\delta$  ppm: 168.38 (b), 129.51 (g or h), 129.29 (g or h), 65.77 (c), 59.16 (a), 32.13-22.21 (e + j), 13.64 (k).

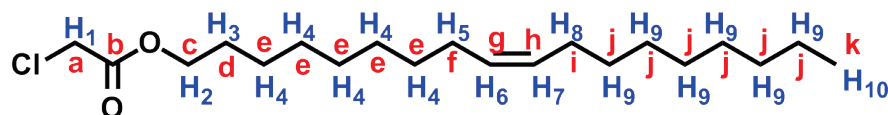

### Oleyl iodoacetic acid (7) - (scheme S1, step iv)

A mixture of  $\text{NaI}$  (100 mmol) and compound **6** (60 mmol) was stirred in acetone (50 ml) overnight at room temperature and protected from the light. The solution was filtered and the solvent was removed via rotary evaporation. The resulting oil was dissolved in heptane,

washed (x2) with aqueous Na<sub>2</sub>S<sub>2</sub>O<sub>5</sub> and (x2) with water, and dried over magnesium sulfate. The product was purified via column chromatography (SiO<sub>2</sub>) using CH<sub>2</sub>Cl<sub>2</sub>/heptane 1:1 as the eluent. The solvent was removed via rotary evaporation yielding a clear oil. Yield: 99%. <sup>1</sup>H-NMR, 400 MHz, CDCl<sub>3</sub>, δ ppm: 5.34 (m, 2H, H<sub>6</sub> + H<sub>7</sub>), 4.13 (t, 2H, J=6.7Hz, H<sub>2</sub>), 3.68 (s, 2H, H<sub>1</sub>), 1.99 (m, 4H, H<sub>5</sub> + H<sub>8</sub>), 1.65 (m, 2H, H<sub>3</sub>), 1.32 (m, 22H, H<sub>4</sub> + H<sub>9</sub>), 0.88 (t, 3H, J=6.3Hz, H<sub>10</sub>). <sup>13</sup>C-NMR, 300 MHz, CDCl<sub>3</sub>, δ ppm: 168.38 (b), 129.51 (g or h), 129.29 (g or h), 65.77 (c), 32.13-22.21 (e + j), 15.23 (a), 13.64 (k).

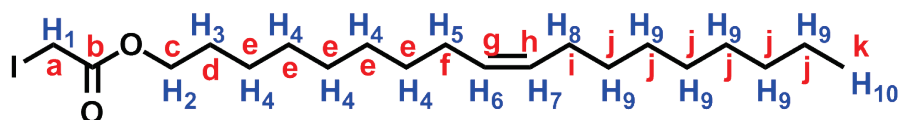

### Octadecyl chloroacetic acid (8) - (scheme S1, step v)

Octadecanol (32 mmol) and 2-chloroacetic acid (40 mmol) were dissolved in 100 ml of toluene. The reaction was set it up and the crude product purified following the same procedure given (*step iii*). Yield: 92%. <sup>1</sup>H-NMR, 400 MHz, CDCl<sub>3</sub>, δ ppm: 4.35 (s, 2H, H<sub>1</sub>), 4.17 (t, 2H, J=6.7Hz, H<sub>2</sub>), 1.63 (m, 2H, H<sub>3</sub>), 1.38 (m, 30H, H<sub>4</sub>+H<sub>5</sub>), 0.88 (t, 3H, J=6.3Hz, H<sub>6</sub>). <sup>13</sup>C-NMR, 300 MHz, CDCl<sub>3</sub>, δ ppm: 168.38 (b), 65.77 (c), 59.21 (a), 32.13-22.21 (e + f), 13.64 (g).

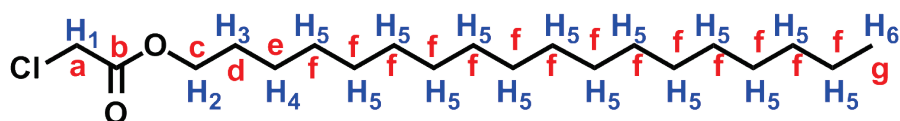

### Octadecyl iodoacetate (9) - (Scheme S1, step vi)

A mixture of NaI (100 mmol) and compound 8 (60 mmol) was stirred in acetone (50 ml). The reaction was set it up and the crude product purified following the same procedure given (*step iv*). Yield: 95%. <sup>1</sup>H-NMR, 400 MHz, CDCl<sub>3</sub>, δ ppm: 4.17 (t, 2H, J=6.7Hz, H<sub>2</sub>), 3.66 (s, 2H, H<sub>1</sub>), 1.63 (m, 2H, H<sub>3</sub>), 1.38 (m, 30H, H<sub>4</sub>+H<sub>5</sub>), 0.88 (t, 3H, J=6.3Hz, H<sub>6</sub>). <sup>13</sup>C-NMR, 300 MHz, CDCl<sub>3</sub>, δ ppm: 168.38 (b), 65.77 (c), 32.13-22.21 (e + f), 15.23 (a), 13.64 (g).

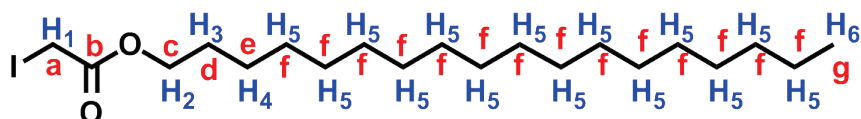

### Synthesis of AgNTf<sub>2</sub> (10) - (Scheme S1, step vii)

HNTf<sub>2</sub> (12.6 mmol) and Ag<sub>2</sub>O (6.3 mmol) were dissolved in 50 ml toluene. The mixture was refluxed overnight and water was removed using a Dean-Stark trap. The solution was concentrated, filtrated and the solvent was removed via rotary evaporation. The resulting brown powder was dissolved in ether and precipitated in CHCl<sub>3</sub>. The precipitate was collected via filtration, washed with CHCl<sub>3</sub>, and dried in vacuum to obtain the product as a white powder. Yield: 59%.

**Scheme S2:** Synthesis of ILC and ion exchange

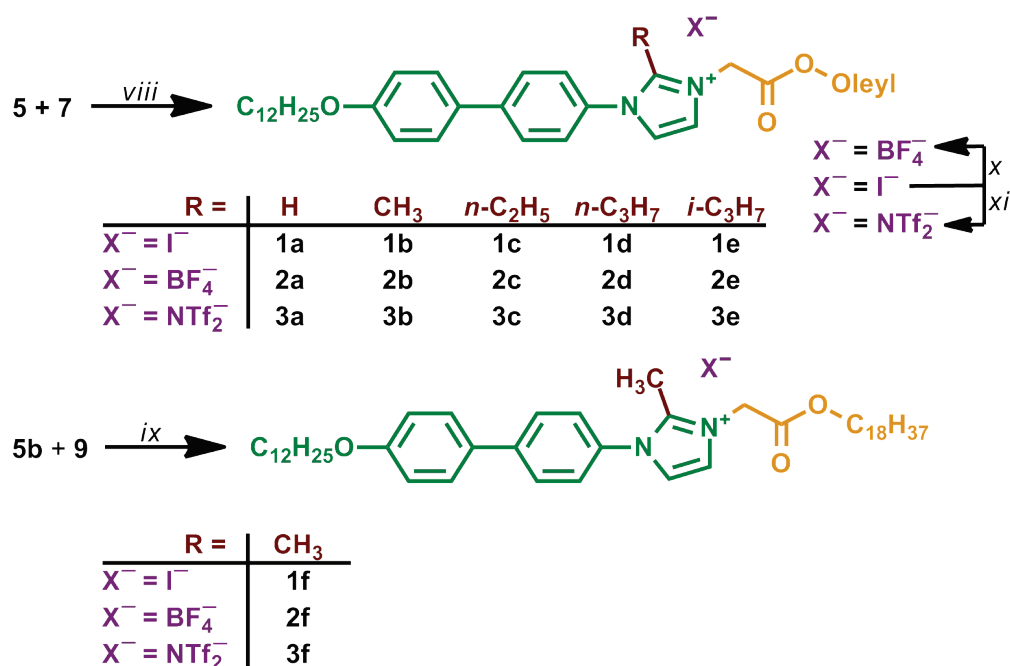

(viii) toluene, 100 °C, 10hrs; (ix) NaBF<sub>4</sub> (aq) multiple washes; (vii) AgNTf<sub>2</sub>, methanol.

**Synthesis of ILC: serie 1**

**Alkylation reaction with oleyl iodide: ILC (1a-1e) -General procedure (Scheme S2, step viii)**

About 200 mg (~0.5 mmol) of the ILC precursor (**5a-5e**) and an excess (1.5 eq.) of the iodoacetic ester (compound **7**) were stirred in a Schlenk tube under argon atmosphere. Toluene (3 mL) was added and the mixture was stirred for 12 hours at 80 °C (compounds **1a**, **1b**) or 100 °C (compounds **1c-1e**). The mixture was precipitated in heptane and separated by centrifugation and decantation. The solids were dissolved in CH<sub>2</sub>Cl<sub>2</sub> and washed with aqueous Na<sub>2</sub>S<sub>2</sub>O<sub>5</sub> (x2), water (x2) and concentrated NaI (x1), dried (MgSO<sub>4</sub>) and the solvent was evaporated. The crude product was precipitated in pentane from CH<sub>2</sub>Cl<sub>2</sub> (x3) and purified via column chromatography (SiO<sub>2</sub>) using CH<sub>2</sub>Cl<sub>2</sub> as the eluent to remove the starting material. To afford the final product the polarity of the mobile phase was gradually increased from 0 → 10% methanol.

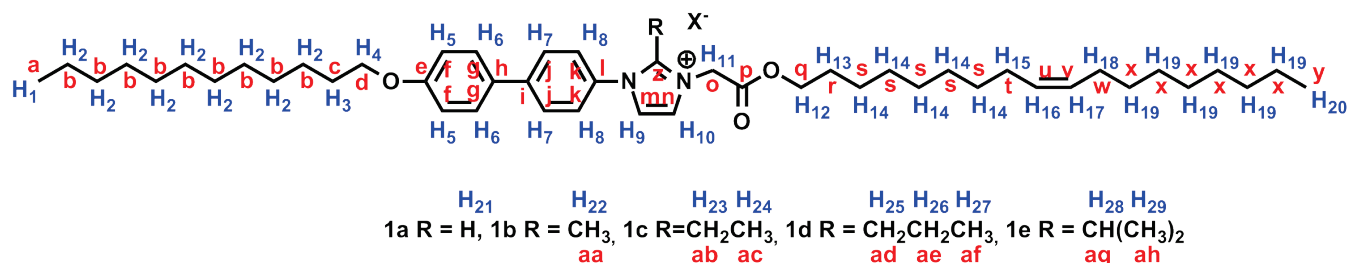

### ILC 1a

Yield: 80% <sup>1</sup>H-NMR, 400 MHz, CDCl<sub>3</sub>, δ ppm: 10.72 (m, 1H, *H*<sub>21</sub>), 7.80 (m, 2H, *H*<sub>8</sub>), 7.76 (m, 2H, *H*<sub>7</sub>), 7.54 (m, 1H, *H*<sub>9</sub> or *H*<sub>10</sub>), 7.53 (m, 2H, *H*<sub>6</sub>), 7.48 (m, 1H, *H*<sub>9</sub> or *H*<sub>10</sub>), 7.00 (m, 2H, *H*<sub>5</sub>), 5.64 (s, 2H, *H*<sub>11</sub>), 5.36 (m, 2H, *H*<sub>16</sub>+*H*<sub>17</sub>), 4.26 (t, 2H, *J*<sub>3</sub>=6.8Hz, *H*<sub>12</sub>), 4.01 (t, 2H, *J*<sub>3</sub>=6.6Hz, *H*<sub>4</sub>), 2.00 (m, 4H, *H*<sub>15</sub>+*H*<sub>18</sub>), 1.82 (t, 2H, *J*<sub>3</sub>=6.8Hz, *H*<sub>13</sub>), 1.71 (t, 2H, *J*<sub>3</sub>=7.3Hz, *H*<sub>3</sub>), 1.40 (m, 40H, *H*<sub>2</sub>+*H*<sub>14</sub>+*H*<sub>19</sub>), 0.88 (m, 6H, *H*<sub>1</sub>+*H*<sub>20</sub>). <sup>13</sup>C-NMR, 300 MHz, CDCl<sub>3</sub>, δ ppm: 165.39 (p), 159.19 (e), 142.93 (l), 136.04 (z), 132.05 (i), 130.34 (h), 129.50 (u or v), 129.28 (u or v), 128.01 (g or j), 127.71 (g or j), 123.97 (m or n), 121.96 (k), 119.69 (m or n), 114.63 (f), 67.72 (d), 66.87 (q), 50.63 (o), 31.44 - 22.22 (b + s + x), 13.65 (a + y).  
HRMS (EI) *m/z* calcd. C<sub>47</sub>H<sub>73</sub>N<sub>2</sub>O<sub>3</sub><sup>+</sup> (cation): 713.56212, found 713.56051

### ILC 1b

Yield: 77% <sup>1</sup>H-NMR, 400 MHz, CDCl<sub>3</sub>, δ ppm: 7.92 (m, 1H, *H*<sub>9</sub> or *H*<sub>10</sub>), 7.72 (m, 2H, *H*<sub>8</sub>), 7.64 (m, 2H, *H*<sub>7</sub>), 7.51 (m, 2H, *H*<sub>6</sub>), 7.35 (m, 1H, *H*<sub>9</sub> or *H*<sub>10</sub>), 6.99 (m, 2H, *H*<sub>5</sub>), 5.47 (s, 2H, *H*<sub>11</sub>), 5.33 (m, 2H, *H*<sub>16</sub>+*H*<sub>17</sub>), 4.23 (t, 2H, *J*=6.9Hz, *H*<sub>12</sub>), 4.00 (t, 2H, *J*=6.6Hz, *H*<sub>4</sub>), 2.75 (s, 3H, *H*<sub>22</sub>), 1.98 (m, 4H, *H*<sub>15</sub>+*H*<sub>18</sub>), 1.80 (p, 2H, *J*=6.5, *H*<sub>13</sub>), 1.68 (m, 2H, *H*<sub>3</sub>), 1.38 (m, 40H, *H*<sub>2</sub>+*H*<sub>14</sub>+*H*<sub>19</sub>), 0.91 (m, 3H, *H*<sub>1</sub> + *H*<sub>20</sub>), 0.86 (t, 3H, *J*=6.9Hz, *H*<sub>1</sub> or *H*<sub>20</sub>). <sup>13</sup>C-NMR, 300 MHz, CDCl<sub>3</sub>, δ ppm: 165.61 (p), 159.22 (e), 146.06 (z), 143.48 (l), 132.13 (i), 130.53 (h), 129.52 (u or v), 129.26 (u or v), 127.82 (g or j), 127.79 (g or j), 126.04 (k), 123.11 (m or n), 121.55 (m or n), 114.65 (f), 67.72 (d), 66.67 (q), 50.69 (o), 31.43-22.13 (b + s + x), 13.65 (a or y), 13.56 (a or y), 12.45 (aa).  
HRMS (EI) *m/z* calcd. C<sub>48</sub>H<sub>75</sub>N<sub>2</sub>O<sub>3</sub><sup>+</sup> (cation): 727.58387, found 727.58175

### ILC 1c

Yield: 82% <sup>1</sup>H-NMR, 400 MHz, CDCl<sub>3</sub>, δ ppm: 7.75 (m, 3H, *H*<sub>8</sub> + *H*<sub>9</sub> or *H*<sub>10</sub>), 7.69 (m, 2H, *H*<sub>7</sub>), 7.54 (m, 2H, *H*<sub>6</sub>), 7.30 (t, 1H, *J*=2.1Hz, *H*<sub>9</sub> or *H*<sub>10</sub>), 7.01 (m, 2H, *H*<sub>5</sub>), 5.43 (d, 2H, *J*=3.6Hz, *H*<sub>11</sub>), 5.36 (m, 2H, *H*<sub>16</sub>+*H*<sub>17</sub>), 4.26 (t, 2H, *J*=6.8Hz, *H*<sub>12</sub>), 4.02 (t, 2H, *J*=6.6Hz, *H*<sub>4</sub>), 3.15 (q, 2H, *J*=7.7Hz, *H*<sub>23</sub>), 2.01 (m, 4H, *H*<sub>15</sub>+*H*<sub>18</sub>), 1.82 (q, 2H, *J*=6.7Hz, *H*<sub>13</sub>), 1.71 (q, 2H, *J*=6.8Hz, *H*<sub>3</sub>), 1.39 (m, 40H, *H*<sub>2</sub>+*H*<sub>14</sub>+*H*<sub>19</sub>), 1.13 (t, 3H, *J*=7.7Hz, *H*<sub>24</sub>), 0.89 (t, 3H, *J*=6.9Hz, *H*<sub>1</sub> or *H*<sub>20</sub>), 0.88 (t, 3H, *J*=6.9Hz, *H*<sub>1</sub> or *H*<sub>20</sub>). <sup>13</sup>C-NMR, 300 MHz, CDCl<sub>3</sub>, δ ppm: 165.86 (p), 159.27 (e), 149.78 (z), 143.64 (l), 132.13 (i), 130.44 (h), 129.53 (u or v), 129.26 (u or v), 127.82 (g + j), 126.07 (k), 123.15 (m or n), 121.97 (m or n), 114.67 (f), 67.74 (d), 66.71(q), 50.61 (o), 31.44 -22.21 (b + s + x), 19.14 (ab), 13.65 (a + y), 11.01 (ac).  
HRMS (EI) *m/z* calcd. C<sub>49</sub>H<sub>77</sub>N<sub>2</sub>O<sub>3</sub><sup>+</sup> (cation): 741.59342 found 741.59071

### ILC 1d

Yield: 83% <sup>1</sup>H-NMR, 400 MHz, CDCl<sub>3</sub>, δ ppm: 7.75 (d, 1H, *J*=2.1Hz, *H*<sub>9</sub> or *H*<sub>10</sub>), 7.74 (m, 2H, *H*<sub>8</sub>), 7.67 (m, 2H, *H*<sub>7</sub>), 7.54 (m, 2H, *H*<sub>6</sub>), 7.30 (d, 1H, *J*=2.2Hz, *H*<sub>9</sub> or *H*<sub>10</sub>), 7.01 (m, 2H, *H*<sub>5</sub>), 5.39 (s, 2H, *H*<sub>11</sub>), 5.34 (m, 2H, *H*<sub>16</sub>+*H*<sub>17</sub>), 4.25 (t, 2H, *J*=6.8Hz, *H*<sub>12</sub>), 4.01 (t, 2H, *J*=6.6Hz, *H*<sub>4</sub>), 3.09 (m, 2H, *H*<sub>25</sub>), 1.99 (m, 4H, *H*<sub>15</sub>+*H*<sub>18</sub>), 1.81 (m, 2H, *H*<sub>13</sub>), 1.70 (m, 2H, *H*<sub>3</sub>), 1.42 (m, 42H, *H*<sub>2</sub>+*H*<sub>14</sub>+*H*<sub>19</sub>+*H*<sub>26</sub>), 0.87 (m, 9H, *H*<sub>1</sub>+*H*<sub>20</sub>+*H*<sub>27</sub>). <sup>13</sup>C-NMR, 300 MHz, CDCl<sub>3</sub>, δ ppm: 165.84 (p), 159.27 (e), 148.81 (z), 143.59 (l), 132.22 (i), 130.42 (h), 129.54 (u or v),

129.25 (u or v), 127.82 (g or j), 127.78 (g or j), 126.16 (k), 123.15 (m or n), 122.01 (m or n), 114.67 (f), 67.74 (d), 66.69 (q), 50.61 (o), 31.44-22.21 (b + s + x + ae), 20.28 (ad), 13.64 (a + y), 13.36 (af).

HRMS (EI) m/z calcd. C<sub>50</sub>H<sub>79</sub>N<sub>2</sub>O<sub>3</sub><sup>+</sup> (cation): 755.60907, found 755.60708

### ILC 1e

Yield: 60% <sup>1</sup>H-NMR, 400 MHz, CDCl<sub>3</sub>, δ ppm: 7.87 (d, 1H, J=2.2Hz, H<sub>9</sub> or H<sub>10</sub>), 7.75 (m, 2H, H<sub>8</sub>), 7.59 (m, 2H, H<sub>7</sub>), 7.55 (m, 2H, H<sub>6</sub>), 7.20 (d, 1H, J=2.2Hz, H<sub>9</sub> or H<sub>10</sub>), 7.02 (m, 2H, H<sub>5</sub>), 5.52 (s, 2H, H<sub>11</sub>), 5.36 (m, 2H, H<sub>16</sub>+H<sub>17</sub>), 4.27 (t, 2H, J=6.8Hz, H<sub>12</sub>), 4.02 (t, 2H, J=6.6Hz, H<sub>4</sub>), 3.38 (m, 1H, H<sub>28</sub>), 2.00 (m, 4H, H<sub>15</sub>+H<sub>18</sub>), 1.82 (m, 2H, H<sub>13</sub>), 1.72 (m, 2H, H<sub>3</sub>), 1.40 (m, 40H, H<sub>2</sub>+H<sub>14</sub>+H<sub>19</sub>), 1.36 (d, 6H, J=7.2Hz, H<sub>29</sub>), 0.88 (t, 6H, J=6.9Hz, H<sub>1</sub>+H<sub>20</sub>). <sup>13</sup>C-NMR, 300 MHz, CDCl<sub>3</sub>, δ ppm: 165.88 (p), 159.35 (e), 150.82 (z), 143.95 (l), 132.37 (i), 130.29 (h), 129.55 (u or v), 129.26 (u or v), 127.83 (g or j), 127.55 (g or j), 126.86 (k), 124.03 (m or n), 122.79 (m or n), 114.70 (f), 67.75 (d), 66.80 (q), 50.81 (o), 31.43-22.21 (b + s + x), 19.81 (ag), 13.64 (ah+a).

HRMS (EI) m/z calcd. C<sub>50</sub>H<sub>79</sub>N<sub>2</sub>O<sub>3</sub><sup>+</sup> (cation): 755.60907, found 755.60681

### Alkylation reaction with octadecyl iodide: ILC 1f (Scheme S2, step ix)

About 200 mg of the ILC precursor (**5b**) and an excess of 2-iodoacetic octadecane (0.77 mmol), (compound **9**), were stirred in 3 ml of toluene. The reaction was set it up and the crude product purified by following the procedure given (*step viii*).

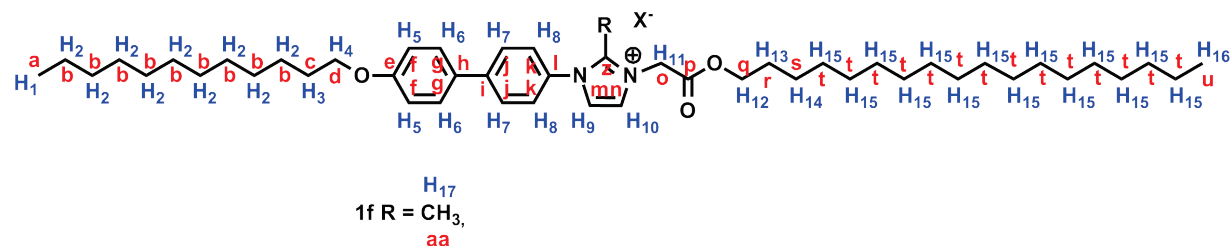

### ILC 1f

Yield: 80% <sup>1</sup>H-NMR, 400 MHz, CDCl<sub>3</sub>, δ ppm: 7.92 (m, 1H, H<sub>9</sub> or H<sub>10</sub>), 7.72 (m, 2H, H<sub>8</sub>), 7.64 (m, 2H, H<sub>7</sub>), 7.51 (m, 2H, H<sub>6</sub>), 7.35 (m, 1H, H<sub>9</sub> or H<sub>10</sub>), 6.99 (m, 2H, H<sub>5</sub>), 5.54 (s, 2H, H<sub>11</sub>), 4.25 (t, 2H, J=6.9Hz, H<sub>12</sub>), 4.01 (t, 2H, J=6.6Hz, H<sub>4</sub>), 2.75 (s, 3H, H<sub>17</sub>), 1.68 (m, 2H, H<sub>3</sub>), 1.63 (m, 2H, H<sub>13</sub>), 1.38 (m, 48H, H<sub>14</sub>+H<sub>15</sub>+H<sub>2</sub>), 0.86 (t, 6H, J=6.9Hz, H<sub>16</sub>+H<sub>1</sub>). <sup>13</sup>C-NMR, 300 MHz, CDCl<sub>3</sub>, δ ppm: 165.61 (p), 159.22 (e), 146.06 (z), 143.48 (l), 132.13 (i), 130.53 (h), 127.82 (g or j), 127.79 (g or j), 126.04 (k), 123.11 (m or n), 121.55 (m or n), 114.65 (f), 67.72 (d), 66.67 (q), 50.69 (o), 31.43-22.13 (b + s + t), 13.65 (a or u), 13.56 (a or u), 12.45 (aa).

HRMS (EI) m/z calcd. C<sub>48</sub>H<sub>77</sub>N<sub>2</sub>O<sub>3</sub><sup>+</sup> (cation): 729.59342, found 729.59060



## Synthesis of ILC series 2

### BF<sub>4</sub><sup>-</sup> metathesis with NaBF<sub>4</sub>: ILC (2a-2f)-General procedure (scheme S2, step x)

About 100mg of the ILC (**1a-1f**) was dissolved in CH<sub>2</sub>Cl<sub>2</sub>. The solution was washed with aqueous NaBF<sub>4</sub> (x3) and water (x3) dried (MgSO<sub>4</sub>) and the solvent was evaporated. A concentrated solution of the product was prepared in CH<sub>2</sub>Cl<sub>2</sub>, filtered (0.2 μm pores), the solvent was evaporated and the final product dried for 24h under vacuum.

#### ILC 2a

<sup>1</sup>H-NMR, 400 MHz, CDCl<sub>3</sub>, δ ppm: 9.38 (s, 1H, H<sub>21</sub>), 7.74 (m, 2H, H<sub>8</sub>), 7.65 (m, 2H, H<sub>7</sub>), 7.56 (t, 1H, J=1.8Hz, H<sub>9</sub> or H<sub>10</sub>), 7.51 (m, 3H, H<sub>6</sub>+H<sub>9</sub> or H<sub>10</sub>), 6.99 (m, 2H, H<sub>5</sub>), 5.36 (m, 2H, H<sub>16</sub>+H<sub>17</sub>), 5.29 (m, 2H, H<sub>11</sub>), 4.25 (t, 2H, J=6.9Hz, H<sub>12</sub>), 4.01 (t, 2H, J=6.6Hz, H<sub>4</sub>), 1.99 (m, 4H, H<sub>15</sub>+H<sub>18</sub>), 1.81 (m, 2H, H<sub>13</sub>), 1.70 (m, 2H, H<sub>3</sub>), 1.35 (m, 40H, H<sub>2</sub>+H<sub>14</sub>+H<sub>19</sub>), 0.88 (t, 6H, J=6.9Hz, H<sub>1</sub>+H<sub>20</sub>). <sup>13</sup>C-NMR, 300 MHz, CDCl<sub>3</sub>, δ ppm: 165.39 (p), 159.19 (e), 142.93 (l), 136.04 (z), 132.05 (i), 130.34 (h), 129.50 (u or v), 129.28 (u or v), 128.01 (g or j), 127.71 (g or j), 123.97 (m or n), 121.96 (k), 119.69 (m or n), 114.63 (f), 67.72 (d), 66.87 (q), 50.63 (o), 31.44 - 22.22 (b + s + x), 13.65 (a + y).

#### ILC 2b

<sup>1</sup>H-NMR, 300 MHz, CDCl<sub>3</sub>, δ ppm: 7.71 (m, 2H, H<sub>8</sub>), 7.56 (d, 1H, J=2.2Hz, H<sub>9</sub> or H<sub>10</sub>), 7.51 (m, 4H, H<sub>7</sub>+H<sub>6</sub>), 7.30 (d, 1H, J=2.2Hz, H<sub>9</sub> or H<sub>10</sub>), 6.99 (m, 2H, H<sub>5</sub>), 5.33 (m, 2H, H<sub>16</sub>+H<sub>17</sub>), 5.14 (s, 2H, H<sub>11</sub>), 4.22 (t, 2H, J=6.9Hz, H<sub>12</sub>), 4.01 (t, 2H, J=6.6Hz, H<sub>4</sub>), 2.56 (s, 3H, H<sub>22</sub>), 1.98 (m, 4H, H<sub>15</sub>+H<sub>18</sub>), 1.81 (m, 2H, H<sub>13</sub>), 1.68 (m, 2H, H<sub>3</sub>), 1.38 (m, 40H, H<sub>2</sub>+H<sub>14</sub>+H<sub>19</sub>), 0.90 (m, 6H, H<sub>1</sub>+H<sub>20</sub>). <sup>13</sup>C-NMR, 300 MHz, CDCl<sub>3</sub>, δ ppm: 165.93 (p), 159.19 (e), 145.80 (z), 143.29 (l), 132.28 (i), 130.58 (h), 129.51 (u or v), 129.28 (u or v), 127.81 (g or j), 127.77 (g or j), 125.80 (k), 122.94 (m or n), 121.53 (m or n), 114.63 (f), 67.71 (d), 66.57 (q), 49.08 (o), 31.43-22.14 (b + s + x), 13.64 (a or y), 13.57 (a or y), 10.07 (aa).

#### ILC 2c

<sup>1</sup>H-NMR, 300 MHz, CDCl<sub>3</sub>, δ ppm: 7.71 (m, 2H, H<sub>8</sub>), 7.56 (d, 1H, J=2.2Hz, H<sub>9</sub> or H<sub>10</sub>), 7.52 (m, 4H, H<sub>7</sub>+H<sub>6</sub>), 7.29 (d, 1H, J=2.2Hz, H<sub>9</sub> or H<sub>10</sub>), 6.98 (m, 2H, H<sub>5</sub>), 5.35 (m, 2H, H<sub>16</sub>+H<sub>17</sub>), 5.15 (s, 2H, H<sub>11</sub>), 4.22 (t, 2H, J=6.9Hz, H<sub>12</sub>), 4.00 (t, 2H, J=6.6Hz, H<sub>4</sub>), 2.98 (q, 2H, J=7.5Hz, H<sub>23</sub>), 1.99 (m, 4H, H<sub>15</sub>+H<sub>18</sub>), 1.81 (m, 2H, H<sub>13</sub>), 1.68 (m, 2H, H<sub>3</sub>), 1.39 (m, 40H, H<sub>2</sub>+H<sub>14</sub>+H<sub>19</sub>), 1.07 (t, 3H, J=7.7Hz, H<sub>24</sub>), 0.87 (t, 6H, J=6.7Hz, H<sub>1</sub>+H<sub>20</sub>). <sup>13</sup>C-NMR, 300 MHz, CDCl<sub>3</sub>, δ ppm: 166.20 (p), 159.20 (e), 149.39 (z), 143.37 (l), 132.31 (i), 130.53 (h), 129.50 (u or v), 129.28 (u or v), 127.81 (g + j), 125.92 (k), 123.13 (m or n), 122.01 (m or n), 114.63 (f), 67.71 (d), 66.53 (q), 48.97 (o), 32.14-22.21 (b + s + x), 17.15 (ab), 13.64 (a + y), 10.54 (ac).

#### ILC 2d

<sup>1</sup>H-NMR, 300 MHz, CDCl<sub>3</sub>, δ ppm: 7.73 (m, 2H, H<sub>8</sub>), 7.54 (m, 4H, H<sub>7</sub>+H<sub>6</sub>), 7.46 (d, 1H, J=2.1Hz, H<sub>9</sub> or H<sub>10</sub>), 7.26 (d, 1H, J=1.6Hz, H<sub>9</sub> or H<sub>10</sub>), 7.00 (m, 2H, H<sub>5</sub>), 5.36 (m, 2H, H<sub>16</sub>+H<sub>17</sub>), 5.14 (s, 2H, H<sub>11</sub>), 4.25 (t, 2H, J=6.8Hz, H<sub>12</sub>), 4.01 (t, 2H, J=6.6Hz, H<sub>4</sub>), 2.94 (m, 2H, H<sub>25</sub>), 1.98 (m, 4H, H<sub>15</sub>+H<sub>18</sub>), 1.81 (m, 2H, H<sub>13</sub>), 1.70 (m, 2H, H<sub>3</sub>), 1.41 (m, 42H, H<sub>2</sub>+H<sub>14</sub>+H<sub>19</sub>+H<sub>28</sub>), 0.86 (m, 9H, H<sub>1</sub>+H<sub>20</sub>+H<sub>29</sub>). <sup>13</sup>C-NMR, 300 MHz, CDCl<sub>3</sub>, δ ppm: 166.14

(p), 159.26 (e), 148.61 (z), 143.55 (l), 132.25 (i), 130.43 (h), 129.54 (u or v), 129.25 (u or v), 127.81 (g + j), 126.04 (k), 122.91 (m or n), 121.94 (m or n), 114.67 (f), 67.74 (d), 66.65 (q), 49.12 (o), 31.44-22.22 (b + s + x + ae), 20.10 (ad), 13.65 (a + y), 13.26 (af).

### ILC 2e

<sup>1</sup>H-NMR, 300 MHz, CDCl<sub>3</sub>, δ ppm: 7.73 (m, 2H, H<sub>8</sub>), 7.52 (m, 5H, H<sub>7</sub>+H<sub>6</sub>+ (H<sub>9</sub> or H<sub>10</sub>)), 7.19 (d, 1H, J=2.2Hz, H<sub>9</sub> or H<sub>10</sub>), 7.01 (m, 2H, H<sub>5</sub>), 5.36 (m, 2H, H<sub>16</sub>+H<sub>17</sub>), 5.22 (s, 2H, H<sub>11</sub>), 4.25 (t, 2H, J=6.8Hz, H<sub>12</sub>), 4.01 (t, 2H, J=6.6Hz, H<sub>4</sub>), 3.32 (m, 1H, H<sub>28</sub>), 1.98 (m, 4H, H<sub>15</sub>+H<sub>18</sub>), 1.81 (m, 2H, H<sub>13</sub>), 1.70 (m, 2H, H<sub>3</sub>), 1.38 (m, 40H, H<sub>2</sub>+H<sub>14</sub>+H<sub>19</sub>), 1.30 (d, 9H, J=7.2Hz, H<sub>29</sub>), 0.87 (t, 6H, J=6.6Hz, H<sub>1</sub>+H<sub>20</sub>). <sup>13</sup>C-NMR, 300 MHz, CDCl<sub>3</sub>, δ ppm: 166.16 (p), 159.31 (e), 150.73 (z), 143.82 (l), 132.47 (i), 130.40 (h), 129.54 (u or v), 129.25 (u or v), 127.82 (g or j), 127.50 (g or j), 126.80 (k), 123.54 (m or n), 122.76 (m or n), 114.67 (f), 67.75 (d), 66.71 (q), 49.52 (o), 31.44-22.22 (b + s + x), 19.17 (ag), 13.65 (ah).

### ILC 2f

<sup>1</sup>H-NMR, 400 MHz, CDCl<sub>3</sub>, δ ppm: 7.92 (m, 1H, H<sub>9</sub> or H<sub>10</sub>), 7.72 (m, 2H, H<sub>8</sub>), 7.64 (m, 2H, H<sub>7</sub>), 7.51 (m, 2H, H<sub>6</sub>), 7.35 (m, 1H, H<sub>9</sub> or H<sub>10</sub>), 6.99 (m, 2H, H<sub>5</sub>), 5.54 (s, 2H, H<sub>11</sub>), 4.25 (t, 2H, J=6.9Hz, H<sub>12</sub>), 4.01 (t, 2H, J=6.6Hz, H<sub>4</sub>), 2.75 (s, 3H, H<sub>17</sub>), 1.68 (m, 2H, H<sub>3</sub>), 1.63 (m, 2H, H<sub>13</sub>), 1.38 (m, 48H, H<sub>14</sub>+H<sub>15</sub>+H<sub>2</sub>), 0.86 (t, 6H, J=6.9Hz, H<sub>16</sub>+H<sub>1</sub>). <sup>13</sup>C-NMR, 300 MHz, CDCl<sub>3</sub>, δ ppm: 165.61 (p), 159.22 (e), 146.06 (z), 143.48 (l), 132.13 (i), 130.53 (h), 127.82 (g or j), 127.79 (g or j), 126.04 (k), 123.11 (m or n), 121.55 (m or n), 114.65 (f), 67.72 (d), 66.67 (q), 50.69 (o), 31.43-22.13 (b + s + t), 13.65 (a or u), 13.56 (a or u), 12.45 (aa).

### Synthesis of ILC: series 3

#### NTf<sub>2</sub><sup>-</sup> metathesis with AgNTf<sub>2</sub> (3a-3f) -General procedure (scheme S2, step xi)

About 100 mg of the ILC (1a-1e) was dissolved in MeOH and a solution of AgNTf<sub>2</sub> in MeOH was slowly added. A yellow precipitate was formed, removed via filtration, and the solvent via rotary evaporation. The resulting solid was dissolved in CH<sub>2</sub>Cl<sub>2</sub> and washed with aqueous LiNTf<sub>2</sub> (x2) and water (x2), dried (MgSO<sub>4</sub>) and the solvent was evaporated. A concentrated solution of the product was prepared in CH<sub>2</sub>Cl<sub>2</sub>, filtered (0,2 μm pores), the solvent was removed and the final product dried for 24h under vacuum.

### ILC 3a

<sup>1</sup>H-NMR, 300 MHz, CDCl<sub>3</sub>, δ ppm: 9.17 (t, 1H, J=1.6Hz, H<sub>21</sub>), 7.74 (m, 2H, H<sub>8</sub>), 7.59 (m, 3H, H<sub>7</sub>+ H<sub>9</sub> or H<sub>10</sub>), 7.55 (m, 1H, H<sub>9</sub> or H<sub>10</sub>), 7.52 (m, 2H, H<sub>6</sub>), 6.99 (m, 2H, H<sub>5</sub>), 5.36 (m, 2H, H<sub>16</sub>+H<sub>17</sub>), 5.22 (s, 2H, H<sub>11</sub>), 4.25 (t, 2H, J=6.8Hz, H<sub>12</sub>), 4.01 (t, 2H, J=6.6Hz, H<sub>4</sub>), 1.99 (m, 4H, H<sub>15</sub>+H<sub>18</sub>), 1.81 (m, 2H, H<sub>13</sub>), 1.69 (m, 2H, H<sub>3</sub>), 1.38 (m, 40H, H<sub>2</sub>+H<sub>14</sub>+H<sub>19</sub>), 0.88 (t, 6H, J=6.7Hz, H<sub>1</sub>+H<sub>20</sub>). <sup>13</sup>C-NMR, 300 MHz, CDCl<sub>3</sub>, δ ppm: 165.29 (p), 159.25 (e), 143.33 (l), 135.28 (z), 131.91 (i), 130.30 (h), 129.51 (u or v), 129.28 (u or v), 128.06 (g or j), 127.77 (g or j), 124.01 (m or n), 122.11 (k), 120.65 (m or n), 114.64 (f), 67.73 (d), 66.99 (q), 50.02 (o), 31.44-22.21 (b + s + x), 13.64 (a + y)

### ILC 3b

<sup>1</sup>H-NMR, 400 MHz, CDCl<sub>3</sub>, δ ppm: 7.76 (m, 2H, *H*<sub>8</sub>), 7.54 (m, 4H, *H*<sub>6</sub>+*H*<sub>7</sub>), 7.42 (d, 1H, *J*=2.2Hz, *H*<sub>9</sub> or *H*<sub>10</sub>), 7.31 (d, 1H, *J*=2.2Hz, *H*<sub>9</sub> or *H*<sub>10</sub>), 7.01 (m, 2H, *H*<sub>5</sub>), 5.36 (m, 2H, *H*<sub>16</sub>+*H*<sub>17</sub>), 5.12 (s, 2H, *H*<sub>11</sub>), 4.25 (t, 2H, *J*=6.8Hz, *H*<sub>12</sub>), 4.02 (t, 2H, *J*=6.6Hz, *H*<sub>4</sub>), 2.57 (s, 3H, *H*<sub>22</sub>), 2.00 (m, 4H, *H*<sub>15</sub>+*H*<sub>18</sub>), 1.82 (m, 2H, *H*<sub>13</sub>), 1.71 (m, 2H, *H*<sub>3</sub>), 1.39 (m, 40H, *H*<sub>2</sub>+*H*<sub>14</sub>+*H*<sub>19</sub>), 0.88 (t, 6H, *J*=6.9Hz, *H*<sub>1</sub> or *H*<sub>20</sub>). <sup>13</sup>C-NMR, 300 MHz, CDCl<sub>3</sub>, δ ppm: 165.56 (p), 159.30 (e), 145.62 (z), 143.73 (l), 131.92 (i), 130.41 (h), 129.55 (u or v), 129.25 (u or v), 127.95 (g or j), 127.84 (g or j), 125.68 (k), 122.68 (m or n), 121.74 (m or n), 114.68 (f), 67.73 (d), 66.91 (q), 49.41 (o), 31.43-22.14 (b + s + x), 13.64 (a or y), 13.57 (a or y), 10.21 (aa).

### ILC 3c

<sup>1</sup>H-NMR, 400 MHz, CDCl<sub>3</sub>, δ ppm: 7.76 (m, 2H, *H*<sub>8</sub>), 7.55 (m, 2H, *H*<sub>6</sub>), 7.51 (m, 2H, *H*<sub>7</sub>), 7.47 (d, 1H, *J*=2.2Hz, *H*<sub>9</sub> or *H*<sub>10</sub>), 7.30 (d, 1H, *J*=2.2Hz, *H*<sub>9</sub> or *H*<sub>10</sub>), 7.01 (m, 2H, *H*<sub>5</sub>), 5.36 (m, 2H, *H*<sub>16</sub>+*H*<sub>17</sub>), 5.13 (s, 2H, *H*<sub>11</sub>), 4.26 (t, 2H, *J*=6.9Hz, *H*<sub>12</sub>), 4.02 (t, 2H, *J*=6.6Hz, *H*<sub>4</sub>), 2.96 (q, 2H, *J*=7.7Hz, *H*<sub>23</sub>), 1.99 (m, 4H, *H*<sub>15</sub>+*H*<sub>18</sub>), 1.82 (m, 2H, *H*<sub>13</sub>), 1.71 (m, 2H, *H*<sub>3</sub>), 1.40 (m, 40H, *H*<sub>2</sub>+*H*<sub>14</sub>+*H*<sub>19</sub>), 1.14 (t, 3H, *J*=7.7Hz, *H*<sub>22</sub>), 0.88 (m, 6H, *H*<sub>1</sub>+*H*<sub>20</sub>). <sup>13</sup>C-NMR, 300 MHz, CDCl<sub>3</sub>, δ ppm: 165.78 (p), 159.32 (e), 149.17 (z), 143.80 (l), 131.92 (i), 130.36 (h), 129.54 (u or v), 129.26 (u or v), 127.94 (g or j), 127.84 (g or j), 125.81 (k), 122.93 (m or n), 122.19 (m or n), 114.68 (f), 67.74 (d), 66.87 (q), 49.15 (o), 32.13-22.21 (b + s + x), 17.23 (ab), 13.64 (a + y), 10.72 (ac).

### ILC 3d

<sup>1</sup>H-NMR, 400 MHz, CDCl<sub>3</sub>, δ ppm: 7.77 (m, 2H, *H*<sub>8</sub>), 7.56 (m, 2H, *H*<sub>6</sub>), 7.51 (m, 2H, *H*<sub>7</sub>), 7.45 (d, 1H, *J*=2.2Hz, *H*<sub>9</sub> or *H*<sub>10</sub>), 7.29 (d, 1H, *J*=2.2Hz, *H*<sub>9</sub> or *H*<sub>10</sub>), 7.02 (m, 2H, *H*<sub>5</sub>), 5.36 (m, 2H, *H*<sub>16</sub>+*H*<sub>17</sub>), 5.13 (s, 2H, *H*<sub>11</sub>), 4.27 (t, 2H, *J*=6.8Hz, *H*<sub>12</sub>), 4.02 (t, 2H, *J*=6.6Hz, *H*<sub>4</sub>), 2.90 (m, 2H, *H*<sub>25</sub>), 1.99 (m, 4H, *H*<sub>15</sub>+*H*<sub>18</sub>), 1.82 (m, 2H, *H*<sub>13</sub>), 1.71 (m, 2H, *H*<sub>3</sub>), 1.42 (m, 42H, *H*<sub>2</sub>+*H*<sub>14</sub>+*H*<sub>19</sub>+*H*<sub>25</sub>), 0.88 (m, 9H, *H*<sub>1</sub>+*H*<sub>20</sub>+*H*<sub>26</sub>). <sup>13</sup>C-NMR, 300 MHz, CDCl<sub>3</sub>, δ ppm: 165.77 (p), 159.32 (e), 148.15 (z), 143.73 (l), 132.00 (i), 130.32 (h), 127.89 (g or j), 127.83 (g or j), 125.86 (k), 123.02 (m or n), 122.23 (m or n), 114.68 (f), 67.74 (d), 66.87 (q), 49.16 (o), 32.13-22.22 (b + s + x + ae), 20.05 (ad), 13.64 (a + y), 13.22 (af).

### ILC 3e

<sup>1</sup>H-NMR, 300 MHz, CDCl<sub>3</sub>, δ ppm: 7.75 (m, 2H, *H*<sub>8</sub>), 7.55 (m, 2H, *H*<sub>6</sub>), 7.51 (m, 2H, *H*<sub>7</sub>), 7.43 (d, 1H, *J*=2.2Hz, *H*<sub>9</sub> or *H*<sub>10</sub>), 7.21 (d, 1H, *J*=2.2Hz, *H*<sub>9</sub> or *H*<sub>10</sub>), 7.01 (m, 2H, *H*<sub>5</sub>), 5.36 (m, 2H, *H*<sub>16</sub>+*H*<sub>17</sub>), 5.19 (s, 2H, *H*<sub>11</sub>), 4.26 (t, 2H, *J*=6.8Hz, *H*<sub>12</sub>), 4.02 (t, 2H, *J*=6.6Hz, *H*<sub>4</sub>), 3.32 (m, 1H, *H*<sub>28</sub>), 1.99 (m, 4H, *H*<sub>15</sub>+*H*<sub>18</sub>), 1.82 (m, 2H, *H*<sub>13</sub>), 1.70 (m, 2H, *H*<sub>3</sub>), 1.38 (m, 40H, *H*<sub>2</sub>+*H*<sub>14</sub>+*H*<sub>19</sub>), 1.30 (d, 6H, *J*=7.2Hz, *H*<sub>29</sub>), 0.88 (t, 3H, *J*=6.9Hz, *H*<sub>1</sub> or *H*<sub>20</sub>), 0.87 (t, 3H, *J*=6.5Hz, *H*<sub>1</sub> or *H*<sub>20</sub>). <sup>13</sup>C-NMR, 300 MHz, CDCl<sub>3</sub>, δ ppm: 165.83 (p), 159.38 (e), 150.77 (z), 144.02 (l), 132.15 (i), 130.27 (h), 129.52 (u or v), 129.29 (u or v), 127.87 (g or j), 127.56 (g or j), 126.84 (k), 123.57 (m or n), 122.82 (m or n), 114.78 (f), 67.75 (d), 66.89 (q), 50.16 (o), 31.44-22.22 (b + s + x), 19.15 (ag), 13.62 (ah)

## ILC 3f

$^1\text{H-NMR}$ , 400 MHz,  $\text{CDCl}_3$ ,  $\delta$  ppm: 7.92 (m, 1H,  $H_9$  or  $H_{10}$ ), 7.72 (m, 2H,  $H_8$ ), 7.64 (m, 2H,  $H_7$ ), 7.51 (m, 2H,  $H_6$ ), 7.35 (m, 1H,  $H_9$  or  $H_{10}$ ), 6.99 (m, 2H,  $H_5$ ), 5.54 (s, 2H,  $H_{11}$ ), 4.25 (t, 2H,  $J=6.9\text{Hz}$ ,  $H_{12}$ ), 4.01 (t, 2H,  $J=6.6\text{Hz}$ ,  $H_4$ ), 2.75 (s, 3H,  $H_{17}$ ), 1.68 (m, 2H,  $H_3$ ), 1.63 (m, 2H,  $H_{13}$ ), 1.38 (m, 48H,  $H_{14}+H_{15}+H_2$ ), 0.86 (t, 6H,  $J=6.9\text{Hz}$ ,  $H_{16}+H_1$ ).  $^{13}\text{C-NMR}$ , 300 MHz,  $\text{CDCl}_3$ ,  $\delta$  ppm: 165.61 (p), 159.22 (e), 146.06 (z), 143.48 (l), 132.13 (i), 130.53 (h), 127.82 (g or j), 127.79 (g or j), 126.04 (k), 123.11 (m or n), 121.55 (m or n), 114.65 (f), 67.72 (d), 66.67 (q), 50.69 (o), 31.43-22.13 (b + s + t), 13.65 (a or u), 13.56 (a or u), 12.45 (aa).

## Mesomorphic properties of ILC (DSC and OPM)

Phase transition enthalpies and entropies of series **2** and **3** are given in Tables 1 and 2.

### Scheme S3

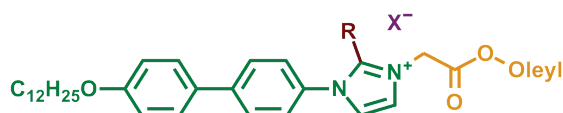

| R =                                            | H  | CH <sub>3</sub> | <i>n</i> -C <sub>2</sub> H <sub>5</sub> | <i>n</i> -C <sub>3</sub> H <sub>7</sub> | <i>i</i> -C <sub>3</sub> H <sub>7</sub> |
|------------------------------------------------|----|-----------------|-----------------------------------------|-----------------------------------------|-----------------------------------------|
| X <sup>-</sup> = BF <sub>4</sub> <sup>-</sup>  | 2a | 2b              | 2c                                      | 2d                                      | 2e                                      |
| X <sup>-</sup> = NTf <sub>2</sub> <sup>-</sup> | 3a | 3b              | 3c                                      | 3d                                      | 3e                                      |

### Scheme S4

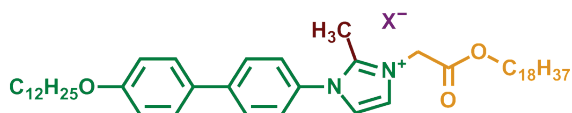

| R =                  | CH <sub>3</sub> |
|----------------------|-----------------|
| X = BF <sub>4</sub>  | 2f              |
| X = NTf <sub>2</sub> | 3f              |

**Table S1.** Mesomorphic properties of ILC for compounds **2a-2e** (Scheme S3) and **2f** (Scheme S4) containing BF<sub>4</sub> as counter ion

| ILC                                                              | 2a  | 2b  | 2c  | 2d  | 2e    | 2f    |
|------------------------------------------------------------------|-----|-----|-----|-----|-------|-------|
| T(Cr-SmA)(°C)                                                    | 76  |     |     |     | 63    | 59    |
| $\Delta H(\text{Cr-SmA})$ (kJ mol <sup>-1</sup> )                | 6.2 |     |     |     | 55    | 41.2  |
| $\Delta S(\text{Cr-SmA})$ (J mol <sup>-1</sup> K <sup>-1</sup> ) | 18  |     |     |     | 163.5 | 124.4 |
| T(SmA-Iso) (°C)                                                  | 208 | 160 | 140 | 79  | 116   | 233   |
| $\Delta H(\text{SmA-Iso})$ (kJ mol <sup>-1</sup> )               | 1.6 | 2.2 | 1.8 | 0.2 | 2     | 2.8   |
| $\Delta S(\text{Cr-SmA})$ (J mol <sup>-1</sup> K <sup>-1</sup> ) | 3.3 | 5   | 4.3 | 0.4 | 5.1   | 5.5   |

**Table S2.** Mesomorphic properties of ILC for compounds **3a-3e** (Scheme S3) and **3f** (Scheme S4) containing Ntf<sub>2</sub> as counter ion

| ILC                                                | <b>3a</b> | <b>3b</b> | <b>3c</b> | <b>3d</b> <sup>(a)</sup> | <b>3e</b> | <b>3f</b> |
|----------------------------------------------------|-----------|-----------|-----------|--------------------------|-----------|-----------|
| T(Cr-SmA)(°C)                                      | 44        | 23        | 17        | -2                       | -2        | 90        |
| ΔH(Cr-SmA) (kJ mol <sup>-1</sup> )                 | 27.2      | 7.7       | 29.5      | 13.4                     | 13.1      | 53        |
| ΔS(Cr-SmA) (J mol <sup>-1</sup> K <sup>-1</sup> )  | 85.9      | 25.7      | 102.2     | 53.1                     | 48        | 149.5     |
| T(SmA-Iso)(°C)                                     | 99        | 83        | 55        | 7                        | 25        | 110       |
| ΔH(SmA-Iso)(kJ mol <sup>-1</sup> )                 | 3         | 2.2       | 1.8       | 1.5                      | 1.3       | 2.5       |
| ΔS(SmA-Iso) (J mol <sup>-1</sup> K <sup>-1</sup> ) | 8.1       | 6.3       | 5.6       | 5.3                      | 4.5       | 6.7       |

(a) ILC **3d** is monotropic, it has a (Cr-Iso) phase transition at 35 °C / ΔH= 47.7 kJ/mol, ΔS = 153 J/mol K.

### Molecular modelling

Our modeling studies were aimed to quantify the value in the rotational energy barrier (C<sub>1</sub>-N<sub>1</sub>) when the size of the lateral chain in the core (R) was increased. The structures were first subjected to structural minimization using Spartan software package (force field: Hartree-Fock/6-31G\*) (scheme S4).

### Scheme S5

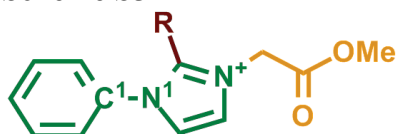

Rotational energy barriers were calculated by rotating the C<sub>1</sub>-N<sub>1</sub> bond 5° and subsequent minimization of the structure (same force field), maintaining the dihedral angle fixed. Energy barriers are given as the difference between the minimum and maximum energies after a rotation of 180 or 360°. Crude data is given in Figure S1

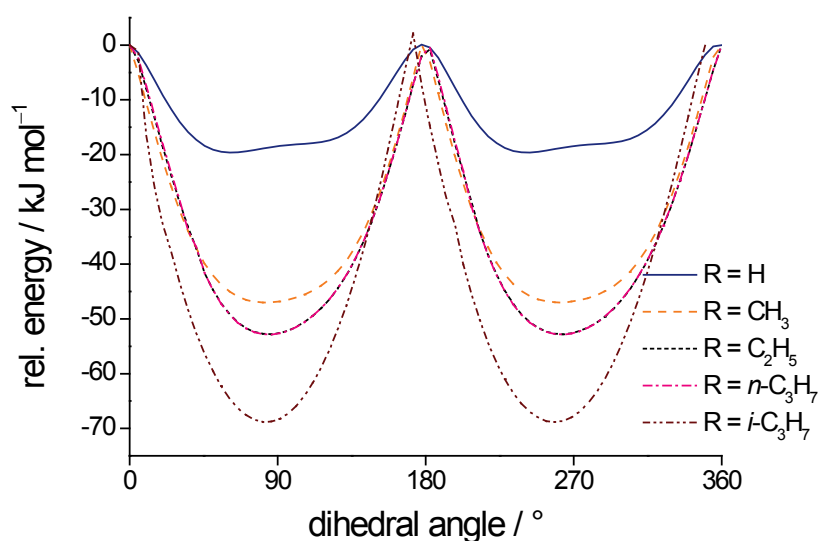

**Figure S1:** Energy barriers for rotations around the C<sub>1</sub>-N<sub>1</sub> bond (scheme S5).

## References

- (1) P. H. J. Kouwer and T. M. Swager, *J. Am. Chem. Soc.*, 2007, **129**, 14042-14052.
- (2) R. A. Altman and S. L. Buchwald, *Org. Lett.* 2006, **8**, 2779-2782.
